# Supplementary material for: Diverse effect of WWOX overexpression in HT29 and SW480 colon cancer cell lines
Source: PubMed Central journal article supplement (PMC4190457; doi:10.1007/s13277-014-2196-2), 2014-06-19
Supplement: 13277_2014_2196_MOESM1_ESM.pdf [file 13277_2014_2196_MOESM1_ESM.pdf]

## **Diverse effect of WWOX overexpression in HT29 and SW480 colon cancer cell lines**

Magdalena Nowakowska<sup>1\*</sup>, Karolina Pospiech<sup>1</sup>, Urszula Lewandowska<sup>2</sup>, Agnieszka W. Piastowska-Ciesielska<sup>3</sup>, Andrzej Kazimierz Bednarek<sup>1</sup>

<sup>1</sup> Department of Molecular Cancerogenesis, Medical University of Lodz, Zeligowskiego 7/9  
90-752 Lodz, Poland

<sup>2</sup> Department of Biomolecular Chemistry, Medical University of Lodz, Mazowiecka 6/8, 92-215 Lodz, Poland

<sup>3</sup> Department of Comparative Endocrinology, Medical University of Lodz, Zeligowskiego 7/9  
90-752 Lodz, Poland

\*Corresponding author

[magdalena.nowakowska@umed.lodz.pl](mailto:magdalena.nowakowska@umed.lodz.pl)

Department of Molecular Cancerogenesis

Medical University of Lodz

Zeligowskiego 7/9

90-752 Lodz, Poland

Tel. +48 42 6393180

In this file we present ontology analysis of microarray data performed with the on line ontology application Pantherdb ([www.pantherdb.org](http://www.pantherdb.org)) for both experimental cell lines.

All attached tables are presenting the specific ontology term and number of genes which were included.

**Table 1** The ontological analysis of the genes modulated by the *WWOX* overexpression in HT29 cancer cell line. Pathways

| <b>Pathway</b>                                                                    | <b>Number of genes</b> |
|-----------------------------------------------------------------------------------|------------------------|
| Unclassified                                                                      | 729                    |
| Wnt signaling pathway                                                             | 14                     |
| Integrin signalling pathway                                                       | 12                     |
| Inflammation mediated by chemokine and cytokine signaling pathway                 | 11                     |
| Heterotrimeric G-protein signaling pathway-Gq alpha and Go alpha mediated pathway | 11                     |
| Heterotrimeric G-protein signaling pathway-Gi alpha and Gs alpha mediated pathway | 11                     |
| Angiogenesis                                                                      | 9                      |
| Huntington disease                                                                | 9                      |
| Alzheimer disease-amyloid secretase pathway                                       | 8                      |
| Apoptosis signaling pathway                                                       | 7                      |
| TGF-beta signaling pathway                                                        | 7                      |
| p53 pathway                                                                       | 6                      |
| PDGF signaling pathway                                                            | 6                      |
| VEGF signaling pathway                                                            | 5                      |
| Metabotropic glutamate receptor group III pathway                                 | 5                      |
| Endothelin signaling pathway                                                      | 5                      |
| Cadherin signaling pathway                                                        | 5                      |

**Table 2** The ontological analysis of the genes modulated by the *WWOX* overexpression in HT29 cancer cell line. Molecular Function.

| <b>Molecular Function</b>          | <b>Number of genes</b> |
|------------------------------------|------------------------|
| Unclassified                       | 323                    |
| binding                            | 273                    |
| catalytic activity                 | 208                    |
| nucleic acid binding               | 151                    |
| protein binding                    | 122                    |
| hydrolase activity                 | 99                     |
| DNA binding                        | 94                     |
| transcription factor activity      | 83                     |
| transcription regulator activity   | 83                     |
| receptor activity                  | 70                     |
| transferase activity               | 57                     |
| structural molecule activity       | 53                     |
| enzyme regulator activity          | 49                     |
| transporter activity               | 49                     |
| transmembrane transporter activity | 48                     |
| receptor binding                   | 43                     |
| peptidase activity                 | 35                     |

|                                           |    |
|-------------------------------------------|----|
| structural constituent of cytoskeleton    | 33 |
| hydrolase activity, acting on ester bonds | 27 |
| kinase activity                           | 25 |
| oxidoreductase activity                   | 24 |
| cation transmembrane transporter activity | 23 |
| ion channel activity                      | 21 |
| G-protein coupled receptor activity       | 21 |
| small GTPase regulator activity           | 20 |
| protein kinase activity                   | 19 |
| RNA binding                               | 19 |
| enzyme inhibitor activity                 | 18 |
| calcium ion binding                       | 17 |
| ligase activity                           | 17 |
| GTPase activity                           | 15 |
| transcription cofactor activity           | 15 |
| serine-type peptidase activity            | 13 |
| cytoskeletal protein binding              | 12 |
| peptidase inhibitor activity              | 11 |
| kinase regulator activity                 | 10 |
| ubiquitin-protein ligase activity         | 10 |
| phosphatase activity                      | 10 |
| structural constituent of ribosome        | 10 |
| voltage-gated ion channel activity        | 10 |

**Table 3** The ontological analysis of the genes modulated by the *WWOX* overexpression in HT29 cancer cell line. Cellular component

| <b>Cellular Component</b>          | <b>Number of genes</b> |
|------------------------------------|------------------------|
| Unclassified                       | 767                    |
| intracellular                      | 41                     |
| cytoskeleton                       | 33                     |
| extracellular matrix               | 23                     |
| extracellular region               | 23                     |
| actin cytoskeleton                 | 15                     |
| microtubule                        | 10                     |
| protein complex                    | 8                      |
| cytoplasm                          | 8                      |
| organelle                          | 7                      |
| mitochondrion                      | 6                      |
| mitochondrial inner membrane       | 5                      |
| SNARE complex                      | 5                      |
| ribonucleoprotein complex          | 5                      |
| intermediate filament cytoskeleton | 4                      |
| cell junction                      | 4                      |
| plasma membrane                    | 4                      |

**Table 4** The ontological analysis of the genes modulated by the *WWOX* overexpression in HT29 cancer cell line. Biological Process

| <b>Biological Process</b>                                             | <b>Number of genes</b> |
|-----------------------------------------------------------------------|------------------------|
| metabolic process                                                     | 319                    |
| primary metabolic process                                             | 298                    |
| Unclassified                                                          | 272                    |
| cellular process                                                      | 245                    |
| cell communication                                                    | 168                    |
| signal transduction                                                   | 159                    |
| nucleobase, nucleoside, nucleotide and nucleic acid metabolic process | 138                    |
| transport                                                             | 123                    |
| protein metabolic process                                             | 113                    |
| developmental process                                                 | 95                     |
| immune system process                                                 | 85                     |
| transcription from RNA polymerase II promoter                         | 81                     |
| transcription                                                         | 81                     |
| cell surface receptor linked signal transduction                      | 75                     |
| system process                                                        | 68                     |
| regulation of transcription from RNA polymerase II promoter           | 64                     |
| protein transport                                                     | 61                     |
| intracellular protein transport                                       | 61                     |
| system development                                                    | 61                     |
| neurological system process                                           | 56                     |
| cell cycle                                                            | 53                     |
| response to stimulus                                                  | 53                     |
| cell adhesion                                                         | 49                     |
| proteolysis                                                           | 47                     |
| intracellular signaling cascade                                       | 41                     |
| cell-cell signaling                                                   | 41                     |
| ion transport                                                         | 39                     |
| ectoderm development                                                  | 39                     |
| protein modification process                                          | 39                     |
| vesicle-mediated transport                                            | 38                     |
| lipid metabolic process                                               | 36                     |
| nervous system development                                            | 36                     |
| mesoderm development                                                  | 36                     |
| G-protein coupled receptor protein signaling pathway                  | 34                     |
| apoptosis                                                             | 33                     |
| cation transport                                                      | 31                     |
| cell-cell adhesion                                                    | 31                     |
| cellular component organization                                       | 30                     |
| synaptic transmission                                                 | 27                     |
| immune response                                                       | 26                     |
| carbohydrate metabolic process                                        | 23                     |
| cellular component morphogenesis                                      | 22                     |
| anatomical structure morphogenesis                                    | 22                     |
| protein amino acid phosphorylation                                    | 21                     |

|                                                                  |    |
|------------------------------------------------------------------|----|
| cell motion                                                      | 19 |
| mitosis                                                          | 19 |
| RNA metabolic process                                            | 16 |
| sensory perception                                               | 16 |
| endocytosis                                                      | 15 |
| phospholipid metabolic process                                   | 15 |
| transmembrane receptor protein tyrosine kinase signaling pathway | 14 |
| reproduction                                                     | 14 |
| translation                                                      | 13 |
| response to stress                                               | 13 |
| muscle contraction                                               | 13 |
| exocytosis                                                       | 13 |
| induction of apoptosis                                           | 13 |
| neurotransmitter secretion                                       | 13 |
| mRNA processing                                                  | 13 |
| cytokine-mediated signaling pathway                              | 11 |
| cellular amino acid metabolic process                            | 11 |
| cellular amino acid and derivative metabolic process             | 11 |
| DNA metabolic process                                            | 11 |
| muscle organ development                                         | 11 |
| gamete generation                                                | 11 |
| respiratory electron transport chain                             | 10 |
| pattern specification process                                    | 10 |
| angiogenesis                                                     | 10 |
| generation of precursor metabolites and energy                   | 10 |
| protein folding                                                  | 10 |
| MAPKKK cascade                                                   | 10 |

**Table 5** The ontological analysis of the genes modulated by the *WWOX* overexpression in SW480 cancer cell line. Pathways

| <b>Pathway</b>                                                                    | <b>Number of genes</b> |
|-----------------------------------------------------------------------------------|------------------------|
| Unclassified                                                                      | 636                    |
| Wnt signaling pathway                                                             | 13                     |
| Integrin signalling pathway                                                       | 10                     |
| Inflammation mediated by chemokine and cytokine signaling pathway                 | 10                     |
| PDGF signaling pathway                                                            | 9                      |
| Huntington disease                                                                | 8                      |
| Cadherin signaling pathway                                                        | 8                      |
| Alzheimer disease-presenilin pathway                                              | 7                      |
| TGF-beta signaling pathway                                                        | 7                      |
| Interleukin signaling pathway                                                     | 6                      |
| Heterotrimeric G-protein signaling pathway-Gi alpha and Gs alpha mediated pathway | 6                      |
| Axon guidance mediated by semaphorins                                             | 5                      |
| p53 pathway                                                                       | 5                      |
| p38 MAPK pathway                                                                  | 5                      |

**Table 6** The ontological analysis of the genes modulated by the *WWOX* overexpression in SW480 cancer cell line. Biological Process

| <b>Biological Process</b>                                             | <b>Number of genes</b> |
|-----------------------------------------------------------------------|------------------------|
| metabolic process                                                     | 287                    |
| primary metabolic process                                             | 276                    |
| Unclassified                                                          | 233                    |
| cellular process                                                      | 229                    |
| nucleobase, nucleoside, nucleotide and nucleic acid metabolic process | 144                    |
| cell communication                                                    | 140                    |
| signal transduction                                                   | 136                    |
| protein metabolic process                                             | 106                    |
| transport                                                             | 98                     |
| developmental process                                                 | 89                     |
| transcription from RNA polymerase II promoter                         | 89                     |
| transcription                                                         | 89                     |
| regulation of transcription from RNA polymerase II promoter           | 70                     |
| immune system process                                                 | 66                     |
| cell surface receptor linked signal transduction                      | 59                     |
| protein transport                                                     | 55                     |
| intracellular protein transport                                       | 55                     |
| system process                                                        | 55                     |
| cellular component organization                                       | 53                     |
| cell cycle                                                            | 50                     |
| intracellular signaling cascade                                       | 48                     |
| protein modification process                                          | 48                     |
| response to stimulus                                                  | 43                     |
| system development                                                    | 43                     |
| cell adhesion                                                         | 42                     |
| neurological system process                                           | 42                     |
| cellular component morphogenesis                                      | 39                     |
| anatomical structure morphogenesis                                    | 39                     |
| proteolysis                                                           | 39                     |
| mesoderm development                                                  | 36                     |
| protein amino acid phosphorylation                                    | 33                     |
| vesicle-mediated transport                                            | 33                     |
| cell-cell signaling                                                   | 27                     |
| lipid metabolic process                                               | 26                     |
| apoptosis                                                             | 26                     |
| ectoderm development                                                  | 25                     |
| nervous system development                                            | 22                     |
| DNA metabolic process                                                 | 21                     |
| ion transport                                                         | 20                     |
| carbohydrate metabolic process                                        | 20                     |
| G-protein coupled receptor protein signaling pathway                  | 19                     |
| reproduction                                                          | 19                     |

|                                                        |    |
|--------------------------------------------------------|----|
| cell-cell adhesion                                     | 18 |
| RNA metabolic process                                  | 17 |
| sensory perception                                     | 17 |
| cation transport                                       | 16 |
| immune response                                        | 16 |
| gamete generation                                      | 16 |
| translation                                            | 14 |
| muscle contraction                                     | 14 |
| cytokine-mediated signaling pathway                    | 14 |
| cell motion                                            | 14 |
| organelle organization                                 | 14 |
| mitosis                                                | 14 |
| cellular defense response                              | 13 |
| endocytosis                                            | 13 |
| visual perception                                      | 12 |
| exocytosis                                             | 12 |
| DNA replication                                        | 12 |
| MAPKKK cascade                                         | 12 |
| phosphate metabolic process                            | 12 |
| respiratory electron transport chain                   | 10 |
| generation of precursor metabolites and energy         | 10 |
| establishment or maintenance of chromatin architecture | 10 |
| synaptic transmission                                  | 10 |

**Table 7** The ontological analysis of the genes modulated by the *WWOX* overexpression in SW480 cancer cell line. Cellular component

| <b>Cellular Component</b>    | <b>Number of genes</b> |
|------------------------------|------------------------|
| Unclassified                 | 649                    |
| intracellular                | 47                     |
| cytoskeleton                 | 38                     |
| extracellular matrix         | 26                     |
| extracellular region         | 26                     |
| actin cytoskeleton           | 18                     |
| microtubule                  | 14                     |
| cytoplasm                    | 8                      |
| mitochondrial inner membrane | 7                      |
| mitochondrion                | 7                      |
| organelle                    | 7                      |
| protein complex              | 5                      |
| intermediate filament        |                        |
| cytoskeleton                 | 4                      |
| cell junction                | 4                      |
| plasma membrane              | 4                      |

**Table 8** The ontological analysis of the genes modulated by the *WWOX* overexpression in SW480 cancer cell line.

| <b>Molecular Function</b>                 | <b>Number of genes</b> |
|-------------------------------------------|------------------------|
| Unclassified                              | 270                    |
| binding                                   | 242                    |
| catalytic activity                        | 176                    |
| nucleic acid binding                      | 140                    |
| protein binding                           | 102                    |
| DNA binding                               | 99                     |
| hydrolase activity                        | 91                     |
| transcription factor activity             | 88                     |
| transcription regulator activity          | 88                     |
| receptor activity                         | 61                     |
| transferase activity                      | 58                     |
| structural molecule activity              | 56                     |
| enzyme regulator activity                 | 42                     |
| structural constituent of cytoskeleton    | 38                     |
| kinase activity                           | 32                     |
| transporter activity                      | 31                     |
| hydrolase activity, acting on ester bonds | 31                     |
| transmembrane transporter activity        | 31                     |
| protein kinase activity                   | 27                     |
| receptor binding                          | 26                     |
| peptidase activity                        | 21                     |
| calcium ion binding                       | 18                     |
| small GTPase regulator activity           | 16                     |
| cytoskeletal protein binding              | 15                     |
| enzyme inhibitor activity                 | 14                     |
| GTPase activity                           | 13                     |
| ligase activity                           | 13                     |
| oxidoreductase activity                   | 12                     |
| kinase regulator activity                 | 11                     |
| phosphatase activity                      | 11                     |
| RNA binding                               | 11                     |
| G-protein coupled receptor activity       | 10                     |
| actin binding                             | 10                     |
